# Supplementary material for: Quinoxaline-Based Anti-Schistosomal Compounds Have Potent Anti-Malarial Activity
Source: PubMed Central journal article supplement (PMC11071471; doi:10.1101/2024.04.23.590861), 2024-04-24
Supplement: NIHPP2024.04.23.590861v1-supplement-1.pdf [file NIHPP2024.04.23.590861v1-supplement-1.pdf]

Compound 22

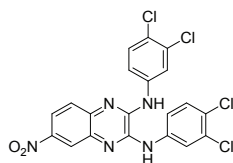

Compound 22c

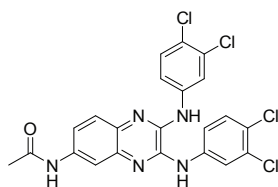

Compound 22f

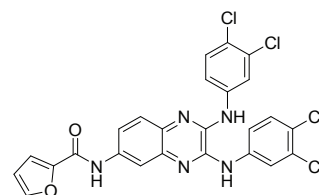

Compound 25

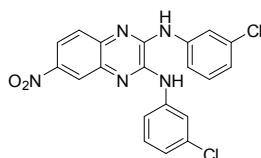

Compound 26

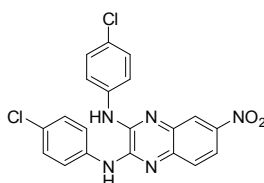

Compound 30

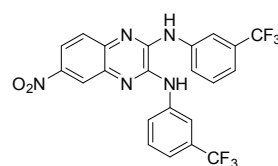

Compound 31

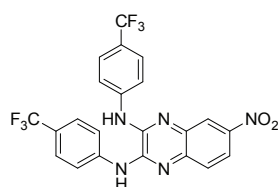

Compound 32

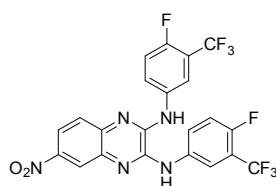

Compound 33

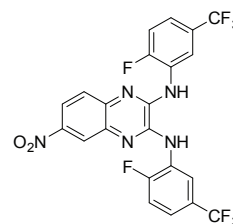

Compound 35

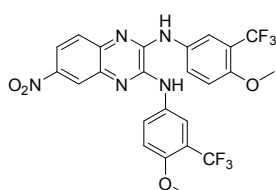

Compound 37

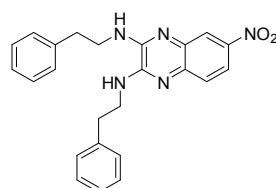

426

427 **Supplementary Figure 1: Structures of compounds**

428

429

A

| Organism             | Gene ID       | Gene name  | Accession no. |
|----------------------|---------------|------------|---------------|
| Human                | ATP8A2        | ATP8A2     | Q9NTI2        |
| <i>P. falciparum</i> | PF3D7_1219600 | ATP2       | Q8I5L4        |
| <i>S. mansoni</i>    | Smp_091650    | Smp_091650 | A0A3Q0KJ05    |
| <i>S. mansoni</i>    | Smp_104500    | Smp_104500 | A0A5K4EK18    |
| <i>S. mansoni</i>    | Smp_163820    | Smp_163820 | A0A5K4EW97    |
| <i>S. mansoni</i>    | Smp_181230    | Smp_181230 | A0A3Q0KTZ9    |
| <i>S. mansoni</i>    | Smp_332390    | Smp_332390 | A0A5K4F868    |
| <i>S. mansoni</i>    | Smp_333250    | Smp_333250 | A0A5K4FA05    |

430

431

B

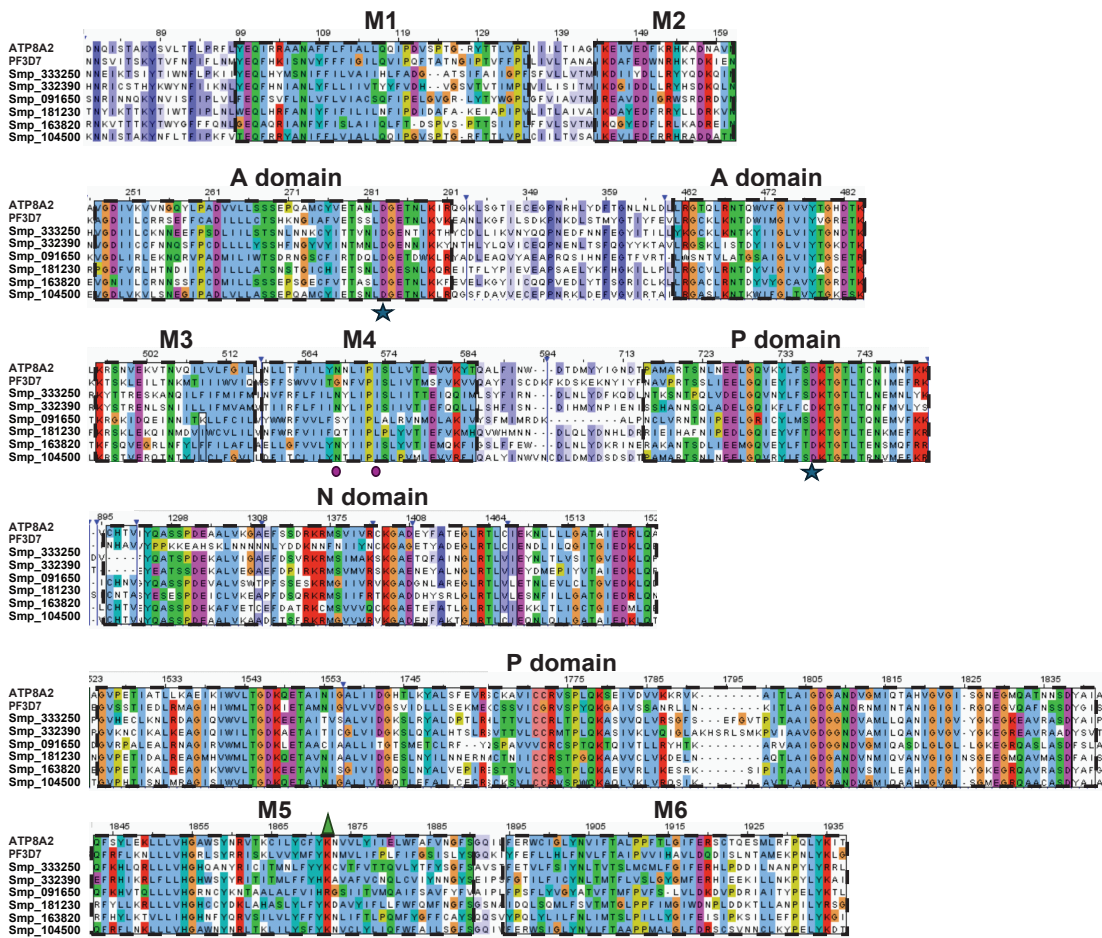

432

433

**Supplementary Figure 2: Sequence alignment of phospholipid flippases. A)** Lipid flippases used in the alignment. **B)** Sequence alignment of human ATP8A2, *P. falciparum* PfATP2, and six putative lipid-translocating ATPases from *S. mansoni*. The actuator (A), nucleotide binding (N), and phosphorylation (P) domains are shown, as well as the first six transmembrane segments (M1-6). Key conserved residues D (in A domain) and E (P domain) involved in the phosphorylation (DKTGT) and dephosphorylation (DGET) cycle are highlighted by a star. The purple circles highlight the conserved N and I residues located in M4 domain that are important for recognition and release of lipid, respectively. The green triangle indicates the K residues in the M5 domain required for the sensitivity to the lipid subtype [14, 28].

442

443 **List of Supplementary Tables**

444

445 **Supplementary Table 1:** Compound information.

446

447 **Supplementary Table 2:** Activity against *Plasmodium* asexual blood stages, *Schistosoma*  
448 schistosomula and HepG2 cells.

449

450 **Supplementary Table 3:** Single-nucleotide variants for compound **22**-selected clones.

451

452 **Supplementary Table 4:** Copy number variants from compound **22**-selected clones.

453
